# Supplementary material for: Evaluation of the Metabolite Profile of Fish Oil Omega-3 Fatty Acids (n-3 FAs) in Micellar and Enteric-Coated Forms—A Randomized, Cross-Over Human Study
Source: MDPI journal article supplement (doi:10.3390/metabo14050265), 2024-05-07
Supplement: s1 [file s1]

# Evaluation of the metabolite profile of Fish Oil Omega-3 fatty acids (n-3 FAs) in Micellar and Enteric Coated Forms – A Randomized, Cross-Over Human Study: Supplementary Data

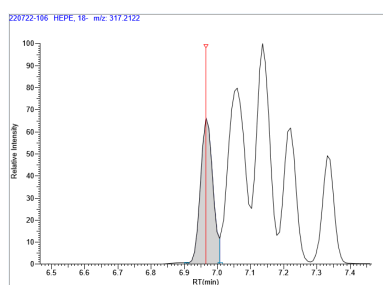

(a)

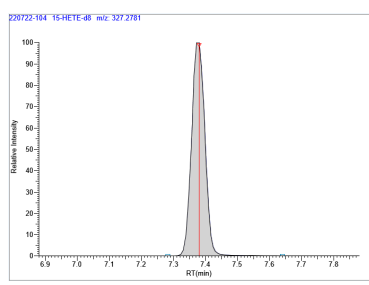

(b)

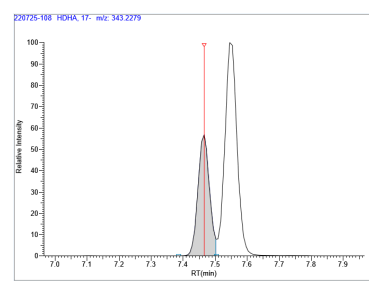

(c)

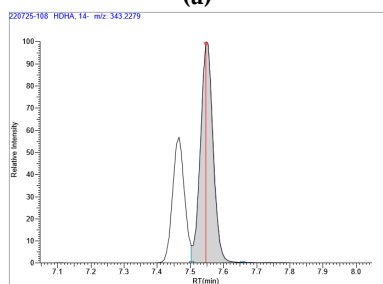

(d)

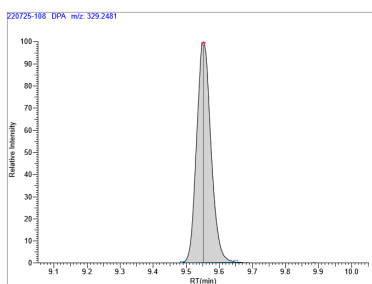

(e)

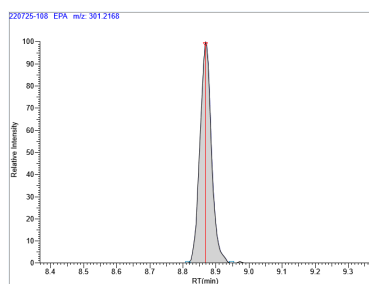

(f)

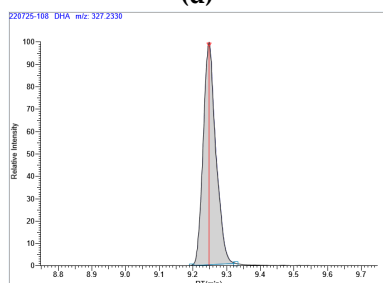

(g)

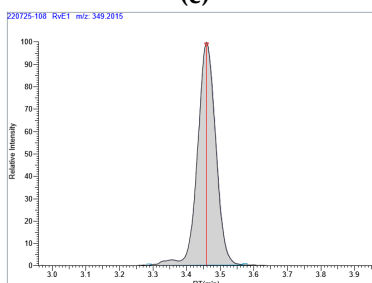

(h)

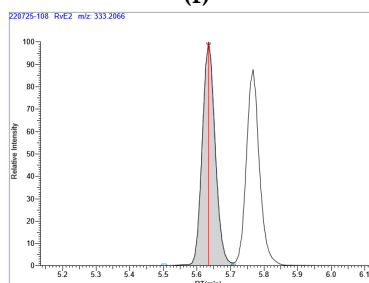

(i)

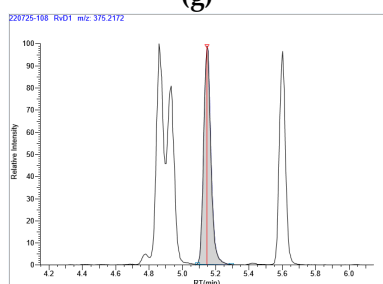

(j)

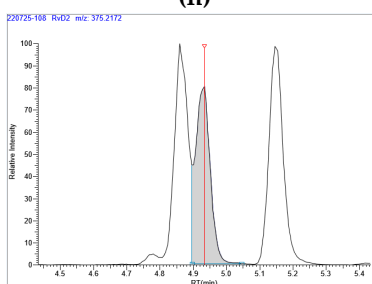

(k)

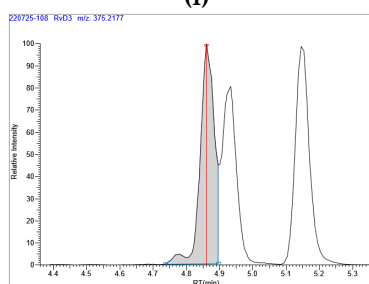

(l)

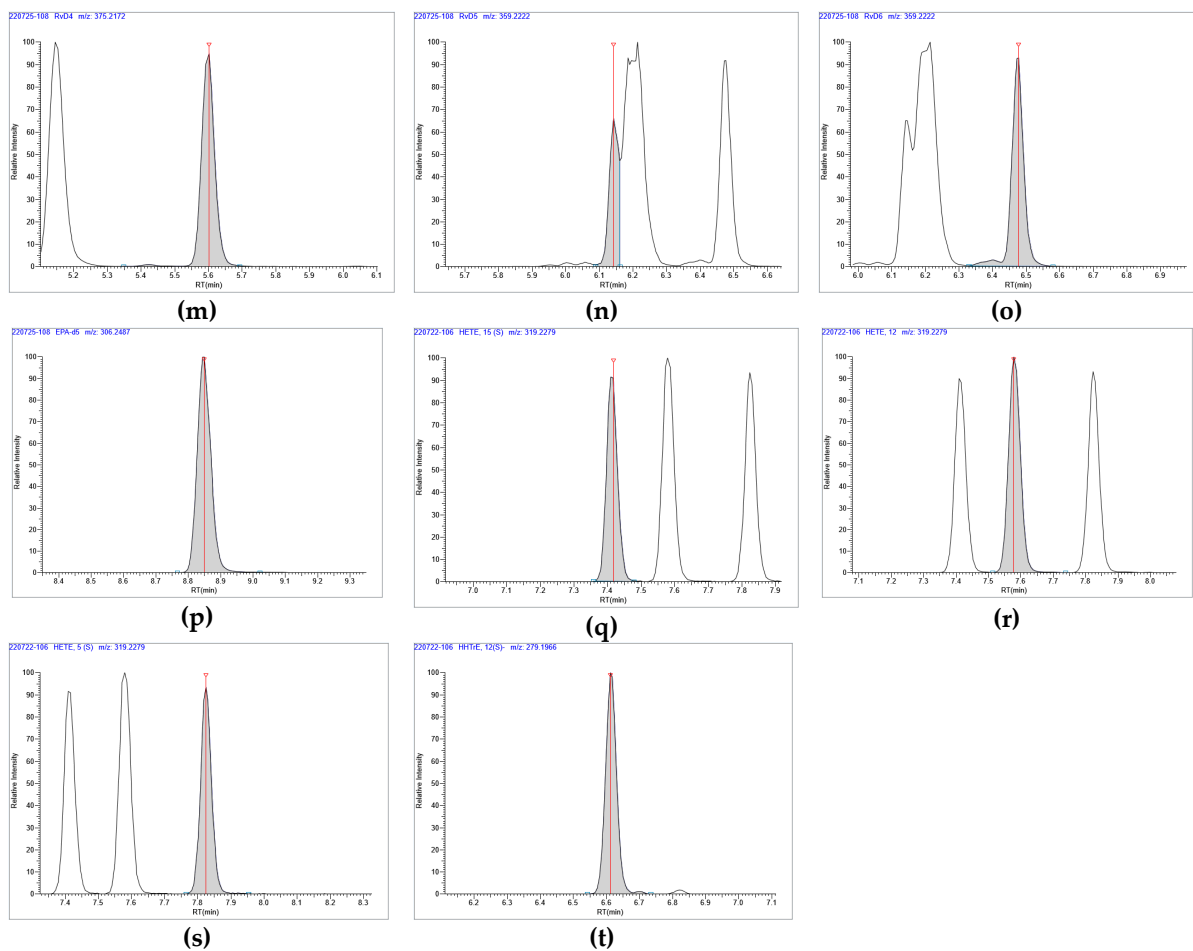

Figure S1: LC-HRMS chromatograms of n3-FAs and their metabolites. (a) 18-HEPE, (b) 15-HETE-d8, (c) 17-HDHA, (d) 14-HDHA, (e) DPA, (f) EPA, (g) DHA, (h) RvE1, (i) RvE2, (j) RvD1, (k) RvD2, (l) RvD3, (m) RvD4, (n) RvD5, (o) RvD6, (p) EPA-d5, (q) 15(S)-HETE, (r) 12(S)-HETE, (s) 5(S)-HETE, (t) 12(S)-HHTrE

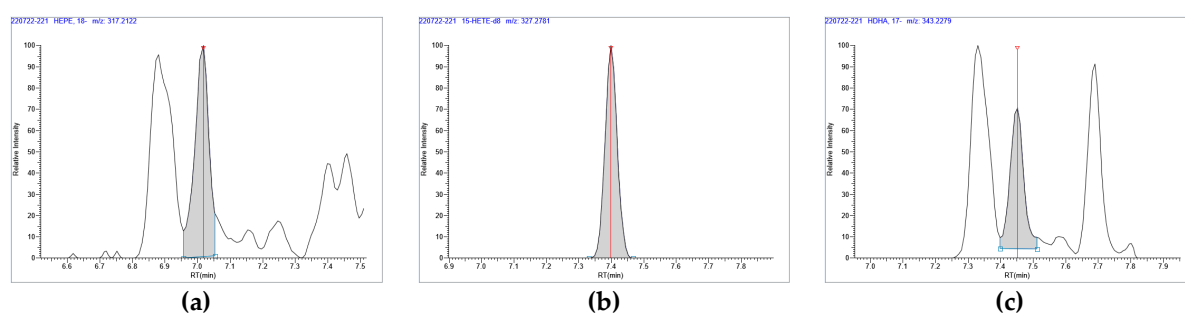

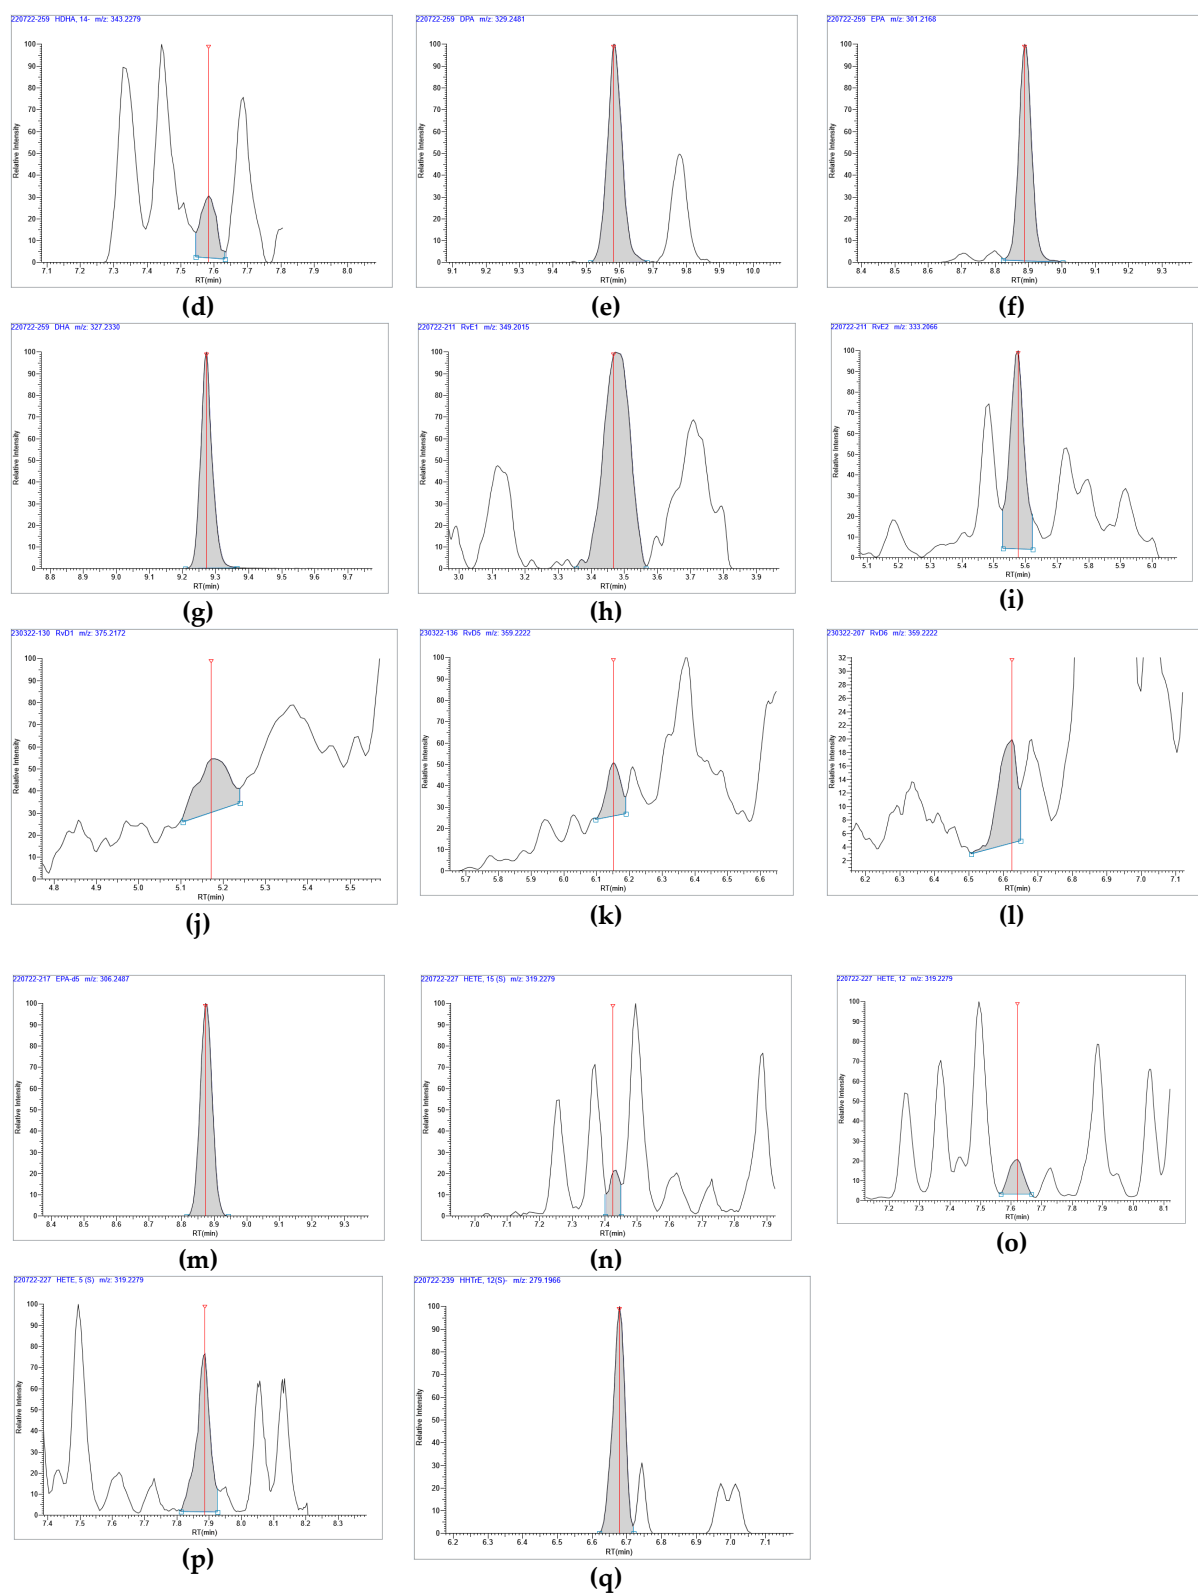

Figure S2: LC-HRMS chromatograms of n3-FAs and their metabolites as detected in participants' blood samples. (a) 18-HEPE, (b) 15-HETE-d8, (c) 17-HDHA, (d) 14-HDHA, (e) DPA, (f) EPA, (g) DHA, (h) RvE1,

(i) RvE2, (j) RvD1, (k) RvD5, (l) RvD6, (m) EPA-d5, (n) 15(S)-HETE, (o) 12(S)-HETE, (p) 5(S)-HETE, (q) 12(S)-HHTrE.

Table S1. HRMS data extraction parameters for n-3 FA and their metabolites

| Compound Name           | Compound Formula | Adduct | Retention Time |
|-------------------------|------------------|--------|----------------|
| 10-HDHA                 | C22H32O3         | M-H    | 7.53           |
| 11-HDHA                 | C22H32O3         | M-H    | 7.60           |
| 11-HEPE                 | C20H30O3         | M-H    | 7.09           |
| 12(S)-HEPE              | C20H30O3         | M-H    | 7.25           |
| 12(S)-HETE              | C20H32O3         | M-H    | 7.60           |
| 12(S)-HHTrE             | C17H28O3         | M-H    | 6.66           |
| 14(s)-HDHA              | C22H32O3         | M-H    | 7.58           |
| 15(s)-HEPE              | C20H30O3         | M-H    | 7.10           |
| 15(S)-HETE              | C20H32O3         | M-H    | 7.26           |
| 15-HETE-d8              | C20H24D8O3       | M-H    | 7.26           |
| 17(S)-HDHA              | C22H32O3         | M-H    | 7.32           |
| 18-HEPE                 | C20H30O3         | M-H    | 6.83           |
| 5(S)-HEPE               | C20H30O3         | M-H    | 7.33           |
| 5(S)-HETE               | C20H32O3         | M-H    | 7.85           |
| 6-keto_Prostaglandin_F1 | C20H34O6         | M-H    | 6.15           |
| 8-HEPE                  | C20H30O3         | M-H    | 7.06           |
| 9-HEPE                  | C20H30O3         | M-H    | 7.13           |
| DHA                     | C22H32O2         | M-H    | 9.12           |
| DHA-d5                  | C22H27O2D5       | M-H    | 9.12           |
| DPA3                    | C22H34O2         | M-H    | 9.41           |
| EPA                     | C20H30O2         | M-H    | 8.74           |
| EPA-d5                  | C20H25D5O2       | M-H    | 8.74           |
| Mr1                     | C22H32O4         | M-H    | 6.22           |
| Mr2                     | C22H32O4         | M-H    | 6.24           |
| PrD1                    | C22H32O4         | M-H    | 6.24           |
| Prostaglandin E3        | C20H30O5         | M-H    | 4.36           |
| Prostaglandin F3a       | C20H30O5         | M-H    | 4.36           |
| Prostaglandin_D2        | C20H32O5         | M-H    | 4.87           |
| Prostaglandin_E2        | C20H32O5         | M-H    | 4.78           |
| Prostaglandin_F2a       | C20H34O5         | M-H    | 5.03           |
| RvD1                    | C22H32O5         | M-H    | 4.75           |
| RvD2                    | C22H32O5         | M-H    | 4.97           |
| RvD3                    | C22H32O5         | M-H    | 4.87           |
| RvD4                    | C22H32O5         | M-H    | 5.62           |
| RvD5                    | C22H32O4         | M-H    | 6.15           |
| RvD6                    | C22H32O4         | M-H    | 6.51           |
| RvE1                    | C20H30O5         | M-H    | 3.46           |

|                |          |     |      |
|----------------|----------|-----|------|
| RvE2           | C20H30O4 | M-H | 5.65 |
| Thromboxane_B2 | C20H34O6 | M-H | 4.51 |

Table S2: Serum triglycerides at various time points during treatment.

| Time (h) | LMF          | STD          | ENT          |
|----------|--------------|--------------|--------------|
| 0        | 2.14 ± 0.73  | 2.16 ± 0.68  | 1.27 ± 0.21  |
| 3        | 1.98 ± 0.50  | 2.24 ± 0.57  | 1.51 ± 0.24  |
| 6        | 2.34 ± 0.40  | 2.34 ± 0.53  | 1.78 ± 0.30  |
| 12       | 2.53 ± 0.67  | 2.58 ± 0.70  | 2.38 ± 0.49* |
| 24       | 1.81 ± 0.52  | 2.09 ± 0.69  | 1.45 ± 0.33  |
| 48       | 1.49 ± 0.40* | 2.99 ± 1.20* | 1.35 ± 0.32  |
| 72       | 1.41 ± 0.24* | 1.54 ± 0.38  | 1.44 ± 0.34  |
| 96       | 1.45 ± 0.29* | 1.81 ± 0.46  | 1.24 ± 0.24  |
| 120      | 1.84 ± 0.61* | 1.40 ± 0.37  | 1.38 ± 0.45  |

2-way ANOVA Repeated Measures using Time 0 as Control with Dunnet multiple comparison correction. \* denotes  $p < 0.05$ .

Table S3: Blood HDL at various time points during treatment.

| Time (h) | LMF         | STD         | ENT         |
|----------|-------------|-------------|-------------|
| 0        | 3.80 ± 0.41 | 4.31 ± 0.61 | 4.10 ± 0.52 |
| 3        | 3.65 ± 0.34 | 4.38 ± 0.67 | 4.03 ± 0.57 |
| 6        | 3.78 ± 0.38 | 4.28 ± 0.69 | 4.28 ± 0.61 |
| 12       | 3.89 ± 0.47 | 4.04 ± 0.64 | 4.04 ± 0.68 |
| 24       | 3.88 ± 0.41 | 4.23 ± 0.68 | 4.32 ± 0.60 |
| 48       | 3.73 ± 0.40 | 4.19 ± 0.83 | 4.31 ± 0.56 |
| 72       | 3.78 ± 0.38 | 4.12 ± 0.66 | 4.10 ± 0.51 |
| 96       | 3.44 ± 0.39 | 4.09 ± 0.66 | 3.79 ± 0.42 |
| 120      | 3.63 ± 0.54 | 4.18 ± 0.66 | 4.17 ± 0.53 |

2-way ANOVA Repeated Measures using Time 0 as Control with Dunnet multiple comparison correction. No significance was found.

Table S4: Blood LDL at various time points during treatment.

| Time (h) | LMF         | STD         | ENT         |
|----------|-------------|-------------|-------------|
| 0        | 2.90 ± 0.4  | 3.31 ± 0.49 | 3.52 ± 0.47 |
| 3        | 2.78 ± 0.35 | 3.36 ± 0.49 | 3.34 ± 0.50 |
| 6        | 2.77 ± 0.36 | 3.21 ± 0.52 | 3.46 ± 0.52 |
| 12       | 2.81 ± 0.49 | 2.64 ± 0.40 | 3.09 ± 0.49 |
| 24       | 3.13 ± 0.47 | 3.28 ± 0.46 | 3.65 ± 0.49 |
| 48       | 3.05 ± 0.36 | 3.32 ± 0.65 | 3.69 ± 0.47 |
| 72       | 3.14 ± 0.37 | 3.94 ± 0.33 | 3.44 ± 0.39 |

|     |                 |                 |                 |
|-----|-----------------|-----------------|-----------------|
| 96  | $2.78 \pm 0.36$ | $3.26 \pm 0.49$ | $3.22 \pm 0.34$ |
| 120 | $2.79 \pm 0.49$ | $4.04 \pm 0.42$ | $3.54 \pm 0.41$ |

2-way ANOVA Repeated Measures using Time 0 as Control with Dunnet multiple comparison correction. No significance was found.

Table S5: Blood LDL/HDL Ratio at various time points during treatment.

| Time (h) | LMF             | STD             | ENT             |
|----------|-----------------|-----------------|-----------------|
| 0        | $2.03 \pm 0.32$ | $2.72 \pm 0.54$ | $2.23 \pm 0.50$ |
| 3        | $2.02 \pm 0.29$ | $2.94 \pm 0.65$ | $2.13 \pm 0.45$ |
| 6        | $2.24 \pm 0.34$ | $3.08 \pm 0.79$ | $2.51 \pm 0.54$ |
| 12       | $2.10 \pm 0.39$ | $2.43 \pm 0.59$ | $2.35 \pm 0.57$ |
| 24       | $2.27 \pm 0.33$ | $3.04 \pm 0.64$ | $2.33 \pm 0.44$ |
| 48       | $2.59 \pm 0.41$ | $2.93 \pm 0.79$ | $2.36 \pm 0.44$ |
| 72       | $2.46 \pm 0.30$ | $3.58 \pm 0.23$ | $2.27 \pm 0.40$ |
| 96       | $2.28 \pm 0.40$ | $2.78 \pm 0.55$ | $2.21 \pm 0.42$ |
| 120      | $2.54 \pm 0.61$ | $3.95 \pm 0.32$ | $2.65 \pm 0.40$ |

2-way ANOVA Repeated Measures using Time 0 as Control with Dunnet multiple comparison correction. No significance was found.

Table S6: Blood TC at various time points during treatment.

| Time (h) | LMF             | STD             | ENT             |
|----------|-----------------|-----------------|-----------------|
| 0        | $5.2 \pm 0.36$  | $5.7 \pm 0.38$  | $5.88 \pm 0.43$ |
| 3        | $5.02 \pm 0.35$ | $5.73 \pm 0.47$ | $5.79 \pm 0.5$  |
| 6        | $5.03 \pm 0.39$ | $5.54 \pm 0.47$ | $5.87 \pm 0.53$ |
| 12       | $5.2 \pm 0.42$  | $5.23 \pm 0.46$ | $5.34 \pm 0.52$ |
| 24       | $5.26 \pm 0.42$ | $5.5 \pm 0.5$   | $6.03 \pm 0.52$ |
| 48       | $5.03 \pm 0.35$ | $5.81 \pm 0.52$ | $6.03 \pm 0.49$ |
| 72       | $5.15 \pm 0.4$  | $5.42 \pm 0.51$ | $5.77 \pm 0.48$ |
| 96       | $4.77 \pm 0.34$ | $5.44 \pm 0.5$  | $5.43 \pm 0.33$ |
| 120      | $4.92 \pm 0.38$ | $5.43 \pm 0.49$ | $5.59 \pm 0.55$ |

2-way ANOVA Repeated Measures using Time 0 as Control with Dunnet multiple comparison correction. No significance was found.

Table S7: Blood non-HDL cholesterol at various time points during treatment.

| Time (h) | LMF             | STD             | ENT             |
|----------|-----------------|-----------------|-----------------|
| 0        | $3.8 \pm 0.41$  | $4.31 \pm 0.61$ | $4.1 \pm 0.52$  |
| 3        | $3.65 \pm 0.34$ | $4.38 \pm 0.67$ | $4.03 \pm 0.57$ |
| 6        | $3.78 \pm 0.38$ | $4.28 \pm 0.69$ | $4.28 \pm 0.61$ |
| 12       | $3.89 \pm 0.47$ | $4.04 \pm 0.64$ | $4.04 \pm 0.68$ |
| 24       | $3.88 \pm 0.41$ | $4.23 \pm 0.68$ | $4.32 \pm 0.6$  |
| 48       | $3.73 \pm 0.4$  | $4.19 \pm 0.83$ | $4.31 \pm 0.56$ |
| 72       | $3.78 \pm 0.38$ | $4.12 \pm 0.66$ | $4.1 \pm 0.51$  |

|     |                 |                 |                 |
|-----|-----------------|-----------------|-----------------|
| 96  | $3.44 \pm 0.39$ | $4.09 \pm 0.66$ | $3.79 \pm 0.42$ |
| 120 | $3.63 \pm 0.54$ | $4.18 \pm 0.66$ | $4.17 \pm 0.53$ |

2-way ANOVA Repeated Measures using Time 0 as Control with Dunnet multiple comparison correction. No significance was found.

Table S8: Serum lipid parameters combining all treatments.

| Time<br>(h) | HDL               | LDL               | LDL/HDL           | TC                | TRG               | non-HDL         |
|-------------|-------------------|-------------------|-------------------|-------------------|-------------------|-----------------|
| 0           | $1.55 \pm 0.11$   | $3.27 \pm 0.26$   | $2.29 \pm 0.27$   | $5.60 \pm 0.23$   | $1.80 \pm 0.32$   | $4.05 \pm 0.28$ |
| 3           | $1.52 \pm 0.11$   | $3.17 \pm 0.26$   | $2.31 \pm 0.27$   | $5.50 \pm 0.26$   | $1.86 \pm 0.24$   | $3.98 \pm 0.3$  |
| 6           | $1.38 \pm 0.10^*$ | $3.14 \pm 0.27$   | $2.56 \pm 0.31$   | $5.45 \pm 0.27$   | $2.14 \pm 0.23$   | $4.08 \pm 0.3$  |
| 12          | $1.34 \pm 0.10^*$ | $2.88 \pm 0.26^*$ | $2.29 \pm 0.29$   | $5.26 \pm 0.26$   | $2.49 \pm 0.33^*$ | $3.98 \pm 0.32$ |
| 24          | $1.47 \pm 0.10^*$ | $3.36 \pm 0.27$   | $2.49 \pm 0.26$   | $5.59 \pm 0.27$   | $1.75 \pm 0.28$   | $4.12 \pm 0.3$  |
| 48          | $1.48 \pm 0.11$   | $3.36 \pm 0.26$   | $2.57 \pm 0.28$   | $5.60 \pm 0.27$   | $1.83 \pm 0.38$   | $4.06 \pm 0.31$ |
| 72          | $1.46 \pm 0.10$   | $3.42 \pm 0.22$   | $2.63 \pm 0.22$   | $5.43 \pm 0.26$   | $1.45 \pm 0.17$   | $3.98 \pm 0.27$ |
| 96          | $1.46 \pm 0.11$   | $3.09 \pm 0.22$   | $2.39 \pm 0.25$   | $5.21 \pm 0.22^*$ | $1.47 \pm 0.18$   | $3.76 \pm 0.27$ |
| 120         | $1.33 \pm 0.12^*$ | $3.42 \pm 0.27$   | $2.96 \pm 0.30^*$ | $5.33 \pm 0.27$   | $1.53 \pm 0.27$   | $4.00 \pm 0.31$ |

2-way ANOVA Repeated Measures using Time 0 as Control with Dunnet multiple comparison correction. \* denotes  $p < 0.05$ .
